# Supplementary material for: Broadening the Action Spectrum of TiO2-Based Photocatalysts to Visible Region by Substituting Platinum with Copper
Source: MDPI journal article supplement (doi:10.3390/nano12091584), 2022-05-07
Supplement: s1 [file s1]

# Broadening the Action Spectrum of TiO<sub>2</sub>-Based Photocatalysts to Visible Region by Substituting Platinum with Copper

Andrey A. Saraev, Anna Yu. Kurenkova, Evgeny Yu. Gerasimov and Ekaterina A. Kozlova \*

Federal Research Center, Boreskov Institute of Catalysis SB RAS, Lavrentieva Ave. 5,  
630090 Novosibirsk, Russia; asaraev@catalysis.ru (A.A.S.); kurenkova@catalysis.ru (A.Y.K.);  
gerasimov@catalysis.ru (E.Y.G.)

\* Correspondence: kozlova@catalysis.ru

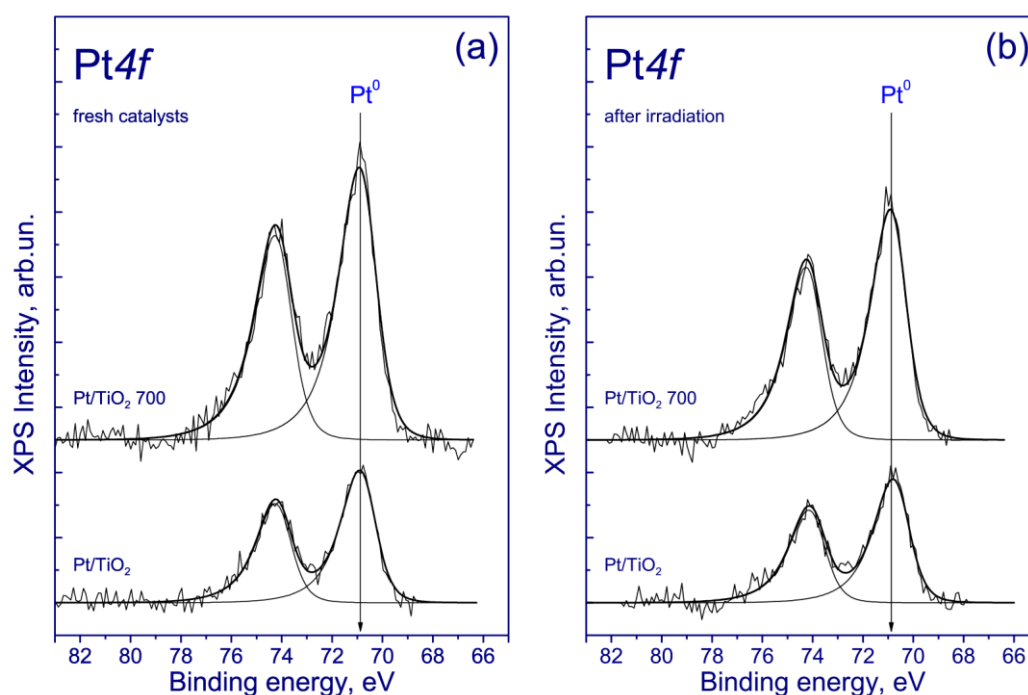

**Figure S1.** Pt<sub>4f</sub> core-level spectra of the fresh (a) Pt-TiO<sub>2</sub> photocatalysts and after irradiation (b) under LED-400 nm. The spectra are normalized to the integral intensity of the corresponding Ti2p core-level spectra.

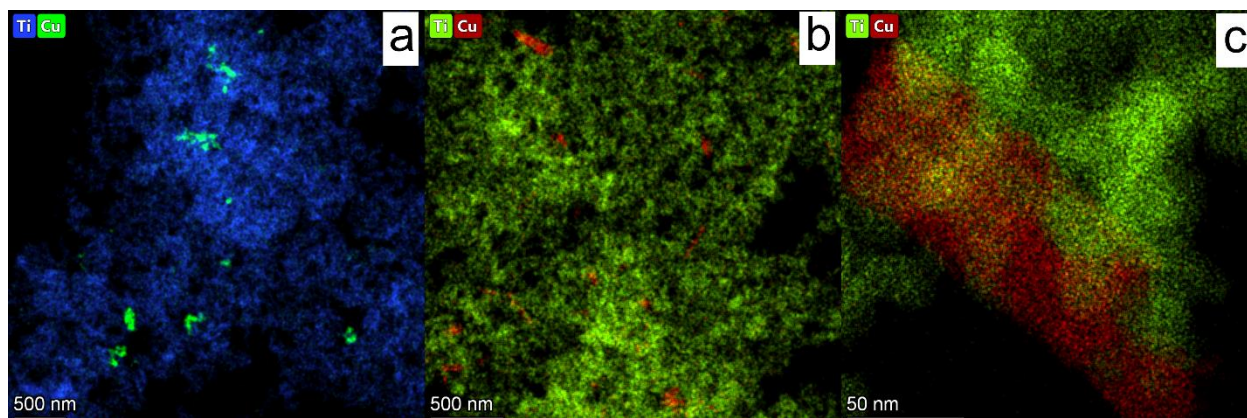

**Figure S2.** EDX mapping (in HAADF STEM mode) of the fresh Cu/TiO<sub>2</sub> (a) catalyst and after irradiation (b,c) for 24 h under LED-450 nm. It is clearly seen that the increase in the quantity of copper particle of 100–200 nm after irradiation.

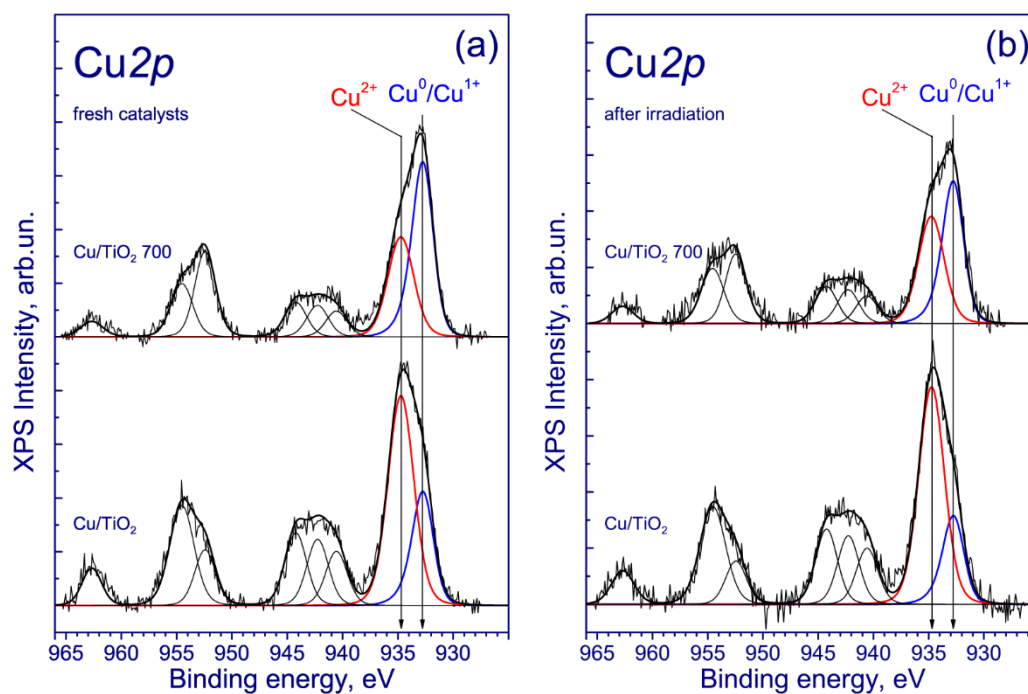

**Figure S3.** Cu<sub>2</sub>p core-level spectra of the fresh (a) Cu-TiO<sub>2</sub> photocatalysts and after irradiation (b) under LED-400 nm. The spectra are normalized to the integral intensity of the corresponding Ti<sub>2</sub>p core-level spectra.

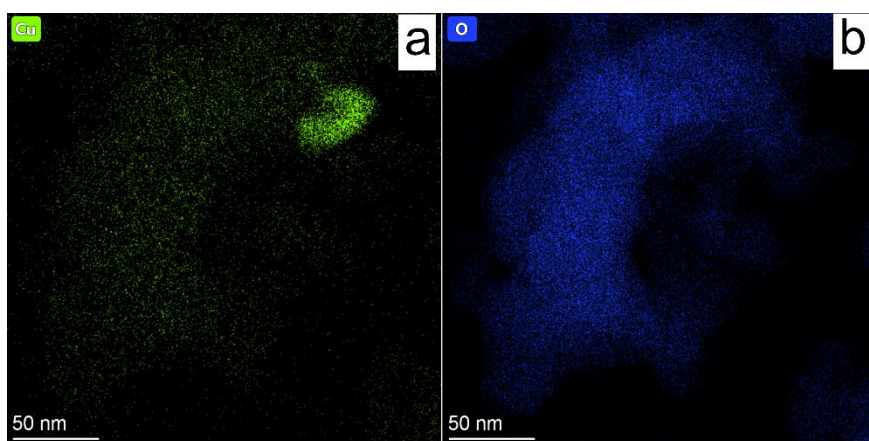

**Figure S4.** EDX mapping (in HAADF STEM mode) of the Cu/TiO<sub>2</sub> 700 catalyst after irradiation for 120 h under LED-400 nm (Cu (a), O (b)). It is clearly seen that the formation of Cu metallic particles takes place.
